# Supplementary material for: Regulation of DNA transposition by CpG methylation and chromatin structure in human cells
Source: PubMed Central journal article supplement (PMC3680223; doi:10.1186/1759-8753-4-15), 2013-05-15
Supplement: 1759-8753-4-15-S1.pdf [file 1759-8753-4-15-S1.pdf]

| Experiment | Activator | Competitor | Methylation | Average Luc values |
|------------|-----------|------------|-------------|--------------------|
| 1          | -         | +          | -           | 1476               |
|            | +         | +          | -           | 2342               |
|            | +         | -          | -           | 21643              |
|            | -         | +          | +           | 849                |
|            | +         | +          | +           | 1629               |
|            | +         | -          | +           | 12289              |
|            | -         | -          | -           | 44                 |
| 2          | -         | +          | -           | 2431               |
|            | +         | +          | -           | 6488               |
|            | +         | -          | -           | 17297              |
|            | -         | +          | +           | 966                |
|            | +         | +          | +           | 2458               |
|            | +         | -          | +           | 5748               |
|            | -         | -          | -           | 54                 |
| 3          | -         | +          | -           | 1693               |
|            | +         | +          | -           | 4479               |
|            | +         | -          | -           | 25389              |
|            | -         | +          | +           | 766                |
|            | +         | +          | +           | 1995               |
|            | +         | -          | +           | 10998              |
|            | -         | -          | -           | 84                 |

Supplementary Table 1. One-hybrid assay reads. Reporter, activator and competitor plasmids were co-transfected into HeLa cells. Cells were harvested 48 hrs post-transfection, and protein extracts were used in luciferase assays. Three repetitions are shown.
